# Supplementary material for: A retinoid X receptor partial agonist attenuates pulmonary emphysema and airway inflammation
Source: PubMed Central journal article supplement (PMC6318915; doi:10.1186/s12931-018-0963-0), 2019-01-03

(A)

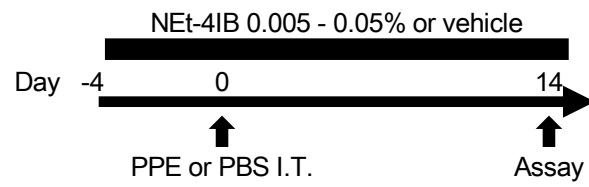

(B)

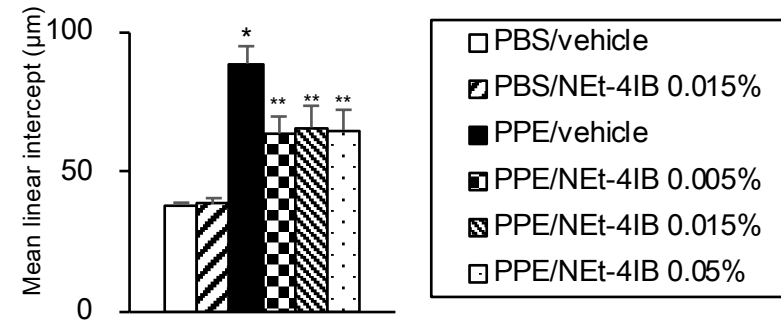

(C)

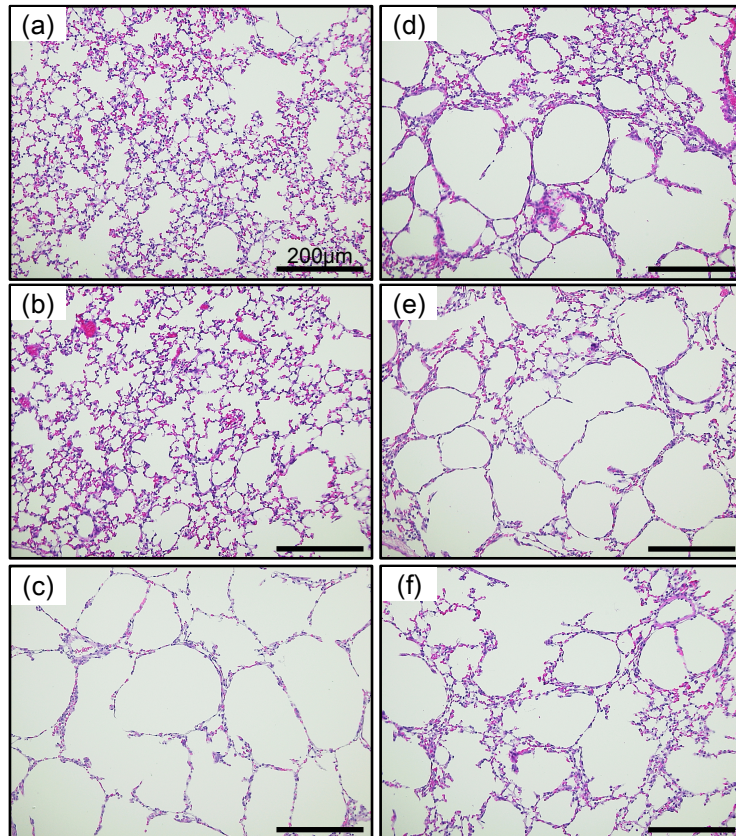

(D)

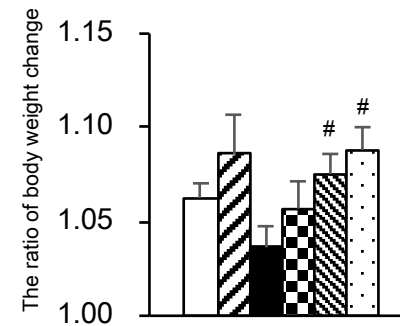

(E)

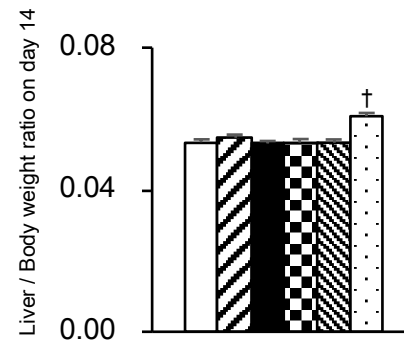

Supplement: 12931_2018_963_MOESM1_ESM.pdf [file 12931_2018_963_MOESM1_ESM.pdf]
