# Supplementary material for: A retinoid X receptor partial agonist attenuates pulmonary emphysema and airway inflammation
Source: PubMed Central journal article supplement (PMC6318915; doi:10.1186/s12931-018-0963-0), 2019-01-03
Supplement: 12931_2018_963_MOESM2_ESM.pdf [file 12931_2018_963_MOESM2_ESM.pdf]

## Additional file 2

|                                      | PBS/vehicle  | PBS/NEt-4IB<br>0.015% | PPE/vehicle  | PPE/NEt-4IB<br>0.005% | PPE/NEt-4IB<br>0.015% | PPE/NEt-4IB<br>0.05% | PPE/Bexarotene<br>0.015% |
|--------------------------------------|--------------|-----------------------|--------------|-----------------------|-----------------------|----------------------|--------------------------|
| BW on day 0 (g)                      | 20.30 ± 0.37 | 20.19 ± 0.35          | 20.89 ± 0.28 | 20.16 ± 0.28          | 20.67 ± 0.34          | 20.54 ± 0.25         | 20.78 ± 0.30             |
| BW on day 14 (g)                     | 21.56 ± 0.31 | 21.89 ± 0.29          | 21.86 ± 0.18 | 21.29 ± 0.29          | 22.21 ± 0.28          | 22.34 ± 0.26 *       | 23.00 ± 0.23 †           |
| Liver weight on day 14 (g)           | 1.15 ± 0.03  | 1.16 ± 0.02           | 1.15 ± 0.02  | 1.11 ± 0.03           | 1.14 ± 0.02           | 1.31 ± 0.02 *        | 1.67 ± 0.04 †            |
| Feed intake<br>(g/day/mouse)         | 2.87         | 2.69                  | 2.73         | 2.78                  | 2.74                  | 2.81                 | 2.79                     |
| RXR agonist intake<br>(mg/day/mouse) | 0            | 40.40                 | 0            | 13.88                 | 41.03                 | 140.56               | 41.81                    |
